# Supplementary material for: Catalytic promiscuity of the non-native FPP substrate in the TEAS enzyme: non-negligible flexibility of the carbocation intermediate
Source: Royal Society of Chemistry journal article supplement (doi:10.1039/c8cp02262c), 2018-01-01
Supplement: c8cp02262c1.pdf [file c8cp02262c1.pdf]

## **Supporting Information**

### **Catalytic Promiscuity of Non-native FPP Substrate in TEAS enzyme: Nonnegligible Flexibility of the Carbocation Intermediate**

Fan Zhang, Yong-Heng Wang, Xiaowen Tang, and Ruibo Wu\*

School of Pharmaceutical Sciences, Sun Yat-sen University, Guangzhou 510006, China

\*E-mail: [wurb3@mail.sysu.edu.cn](mailto:wurb3@mail.sysu.edu.cn)

**Table S1; Figure S1-S7**

**Table S1.** Summary of available crystal structures (with published literature) for TEAS.

| <b>PDB Entry</b> | <b>Ligand</b>                  | <b>Resolution(Å)</b> | <b>Mutant</b>               | <b>Missing Residues</b> |
|------------------|--------------------------------|----------------------|-----------------------------|-------------------------|
| <b>5EAS</b>      | /                              | 2.25                 | /                           | 1-23 522-532            |
| <b>5EAT</b>      | FHP                            | 2.80                 | /                           | 1-16                    |
| <b>5EAU</b>      | Trifluoro-FPP                  | 2.15                 | /                           | 1-20 524-528            |
| <b>1HX9</b>      | FHP                            | 3.50                 | W273S                       | 1-20 98-102             |
| <b>1HXA</b>      | FHP                            | 2.32                 | W273S                       | 1-20                    |
| <b>1HXC</b>      | FHP                            | 2.25                 | C440W                       | 1-20 521-532            |
| <b>1HXG</b>      | /                              | 2.90                 | W273S/C440W                 | 1-20 521-532            |
| <b>3LZ9</b>      | (2-trans,6-trans)-2-fluoro-FPP | 2.28                 | A274T/V372I/<br>Y406L/V516I | 524-530                 |
| <b>3M00</b>      | (2-cis,6-trans)-2-fluoro-FPP   | 2.10                 | A274T/V372I/<br>Y406L/V516I | 524-528                 |
| <b>3M01</b>      | (2-trans,6-trans)-2-fluoro-FPP | 2.60                 | /                           | 523-527                 |
| <b>3M02</b>      | (2-cis,6-trans)-2-fluoro-FPP   | 2.50                 | /                           | 1-13                    |
| <b>4DI5</b>      | 1GA                            | 2.30                 | /                           | 1-13                    |
| <b>4RNQ</b>      | 1GA                            | 2.47                 | /                           | 1-20                    |
| <b>5DHI</b>      | /                              | 2.25                 | W273E                       | 1-12                    |
| <b>5DHK</b>      | FAR                            | 2.43                 | W273E                       | 1-12                    |
| <b>5IK0</b>      | FPP                            | 2.20                 | /                           | 1-12                    |
| <b>5IK6</b>      | PPI&GA                         | 2.30                 | /                           | 1-12                    |
| <b>5IK9</b>      | FMP                            | 2.23                 | /                           | 1-12                    |
| <b>5IKA</b>      | PPI                            | 2.45                 | /                           | 1-12                    |
| <b>5IKH</b>      | (-)-premnaspirodiene           | 2.10                 | A274T/V372I/<br>Y406L/V516I | 1-12                    |

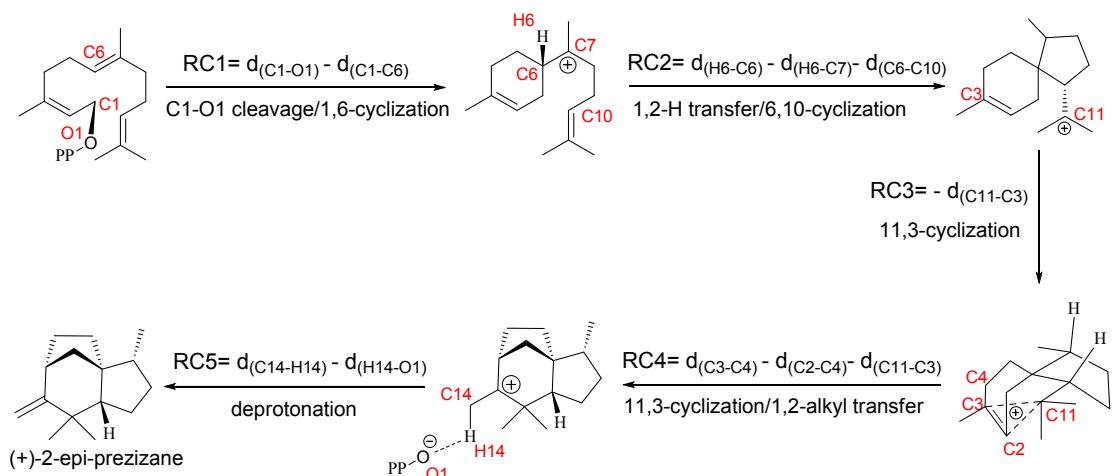

**Figure S1.** The defined reaction coordinates (RC) for biosynthesis of (+)-2-epi-prezizaene by TEAS-catalyzed (*cis,trans*)-FPP cyclizations.

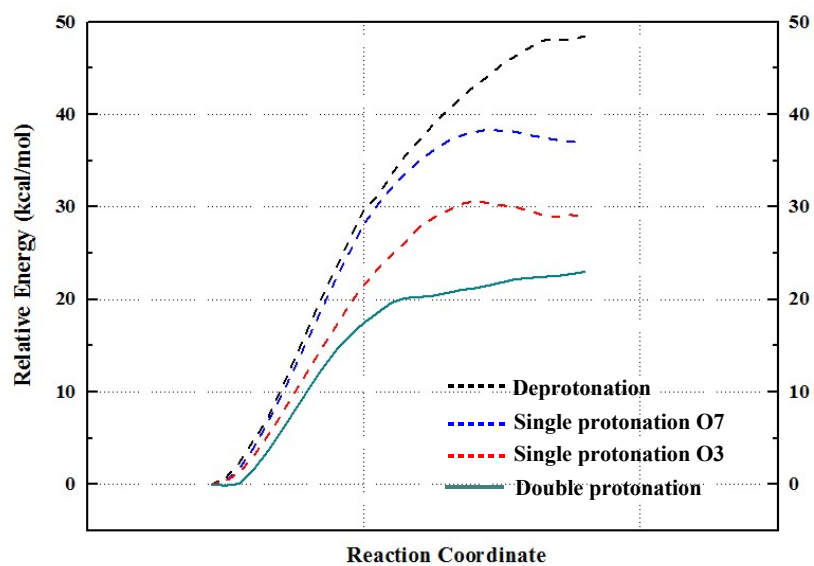

**Figure S2.** The relative energy profiles of (cis,trans)-FPP PPi cleavage for different protonation states in TEAS. All these profiles were obtained after minimizing the energy pathway forward and backward several times.

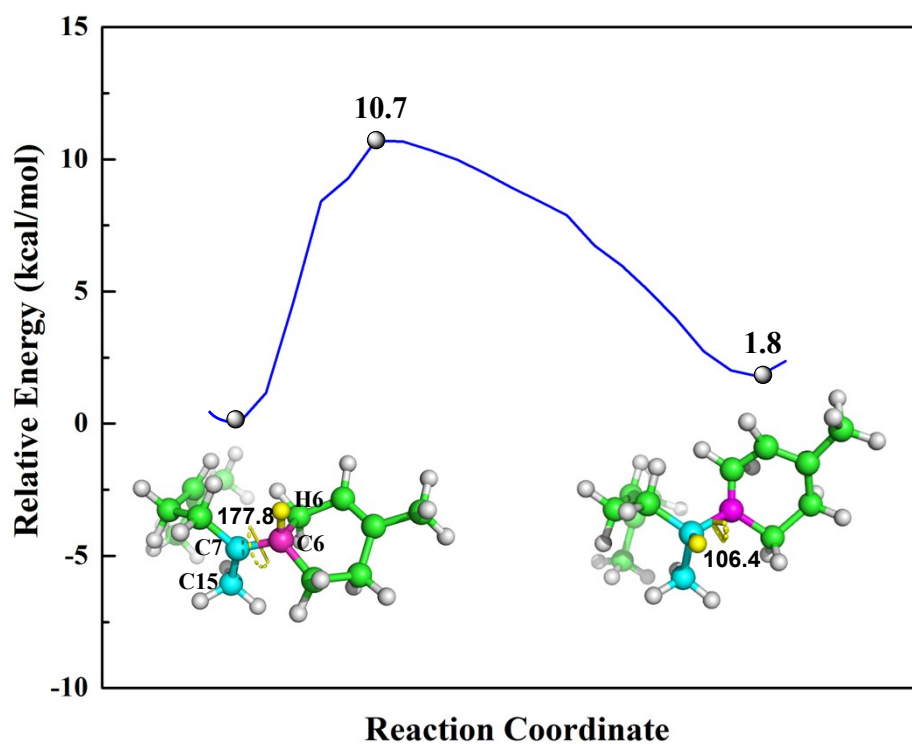

**Figure S3.** The relative energy profiles of direct 1,2-hydride transfer from bisaboly cation A1 conformation, as well as the predicted structures of the reactant and product state. One hand, the energy barrier is ~11 kcal/mol, disagreed with the observations of previous sesquiterpene synthases computational studies in which an appropriate hydride transfer often appear as low barrier and exothermic steps.<sup>23, 26</sup> The other hand, the dihedral of labeled atoms (H6-C6-C7-C15) is measured, indicating the rotation of C-6-C7 is necessary to promote the 1,2-hydride transfer. Therefore, direct 1,2-hydride transfer is excluded and the concerted mechanism is considered as discussed in main text.

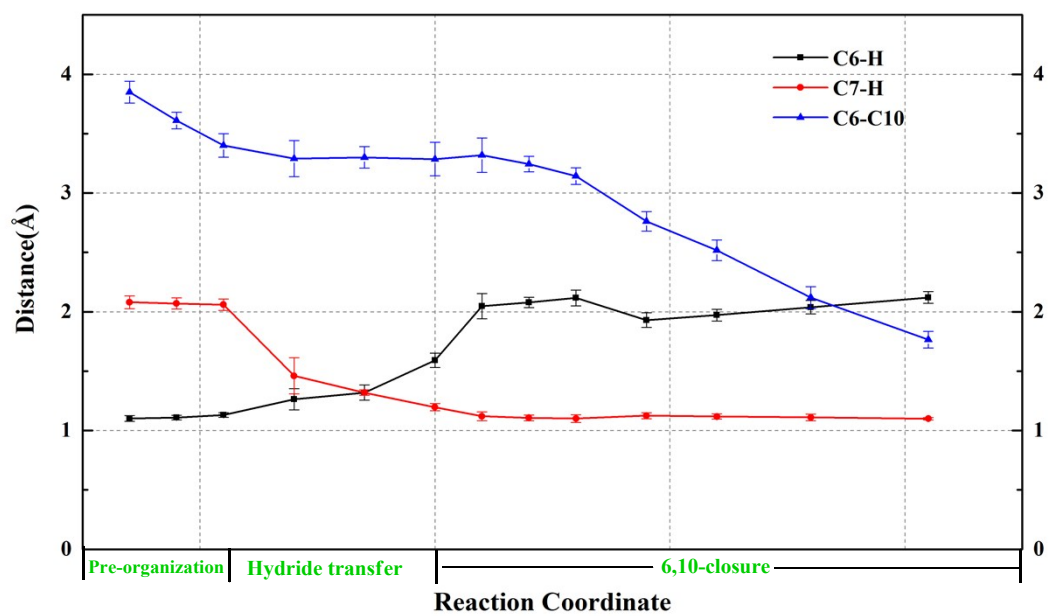

**Figure S4.** The C6-H/C7-H/C6-C10 distance evolutions during concerted hydride transfer and 6,10-closure.

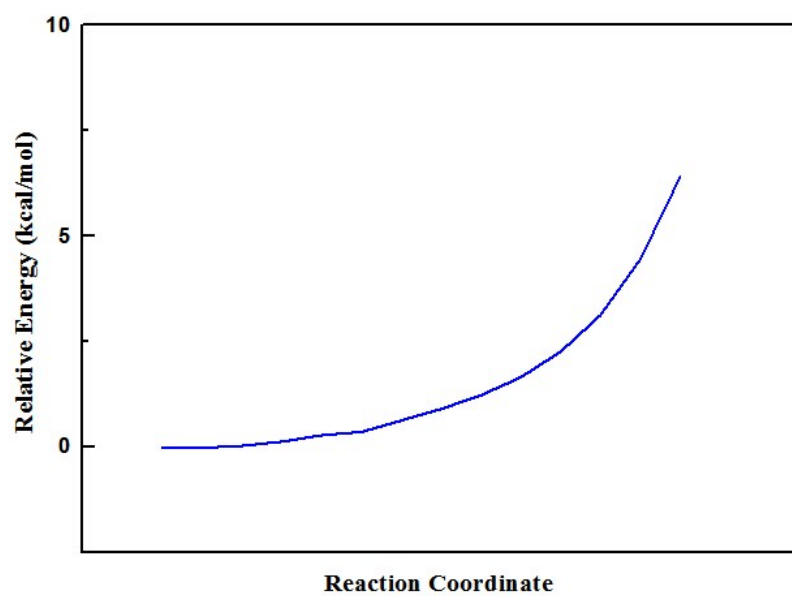

**Figure S5.** The relative energy profile of 11,2-closure from C1'.

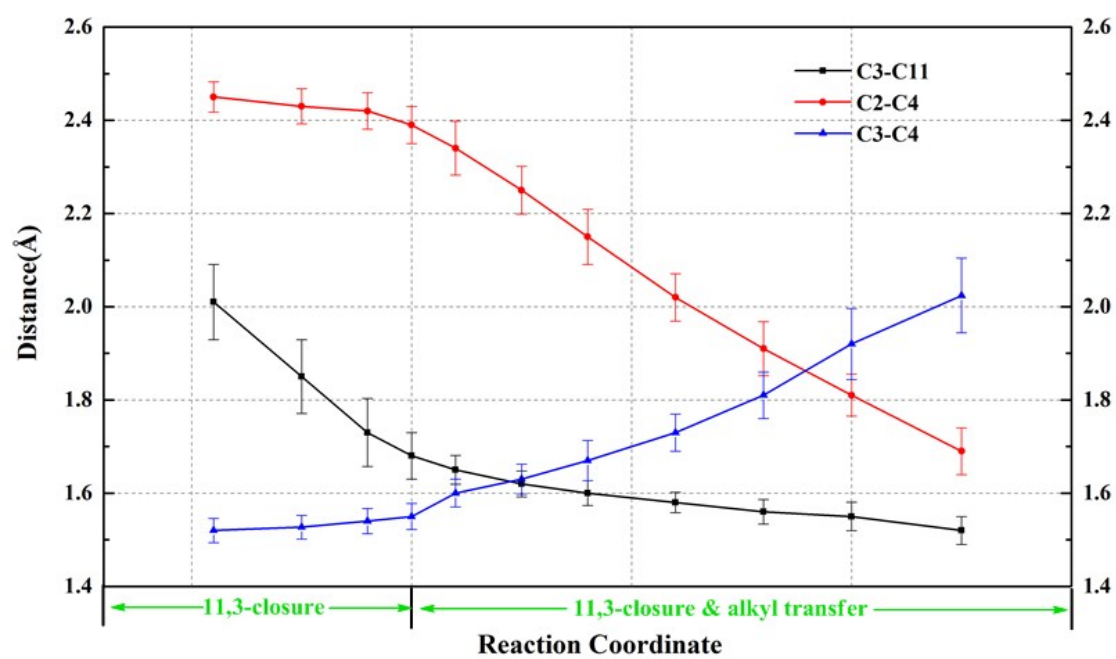

**Figure S6.** The C3-C11/C2-4/C3-C4 distance evolutions during concerted 11,3-closure and 1.2-alkyl transfer.



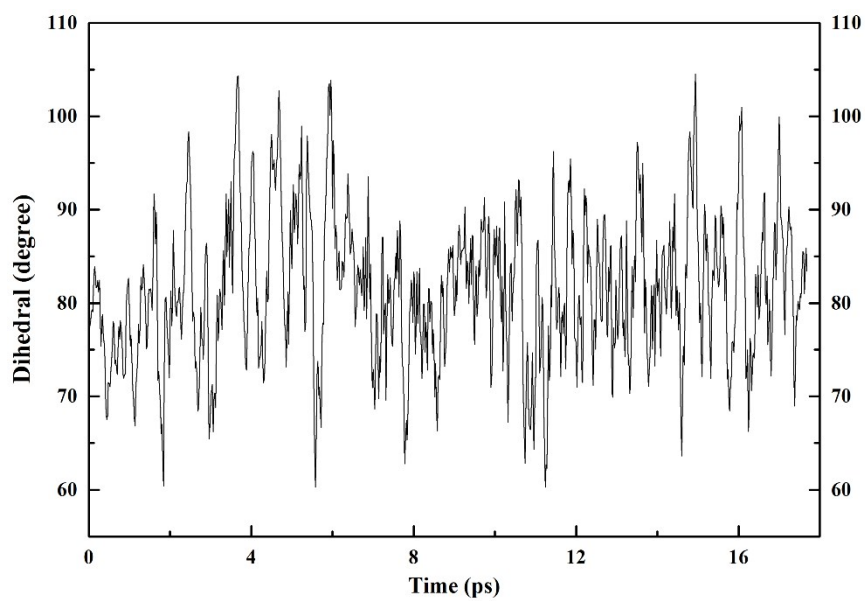

**Figure S7.** The C1-C6-C7-C15 dihedral distribution along the simulation timescale of bisabolylation in TEAS. The lower dihedral indicate the H5 approaching the PPi group, as shown in Figure 8.
